# Supplementary material for: Correlation between circulating cell‐free PIK3CA tumor DNA levels and treatment response in patients with PIK3CA‐mutated metastatic breast cancer
Source: PubMed Central journal article supplement (PMC5983134; doi:10.1002/1878-0261.12305), 2018-05-04
Supplement: MOL2-12-925-s001.pdf [file MOL2-12-925-s001.pdf]

## SUPPLEMENTARY INFORMATION

Kodahl AR *et al.* Correlation between circulating cell-free *PIK3CA* tumor DNA levels and treatment response in patients with *PIK3CA*-mutated metastatic breast cancer.

**Table S1. Level of detection and level of blank of the ddPCR assay.** From non-mutated serum samples the level of detection (LoD) was calculated based on the level of blanks (LoB) from pre-amplified cell-free plasma DNA using the Q5 High-Fidelity DNA Polymerase (New England BioLabs).

|                                     | <b>E542K</b> | <b>E545K</b> | <b>H1047R</b> | <b>H1047L</b> |
|-------------------------------------|--------------|--------------|---------------|---------------|
| <b>LoB (%)</b>                      | 0.024        | 0.024        | 0.039         | 0.005         |
| <b>Std.dev. (%)</b>                 | 0.0097       | 0.0136       | 0.0188        | 0.0046        |
| <b>LoD (%)<br/>(95% confidence)</b> | 0.0435       | 0.0513       | 0.0763        | 0.0141        |
| <b>n</b>                            | 40           | 34           | 26            | 33            |

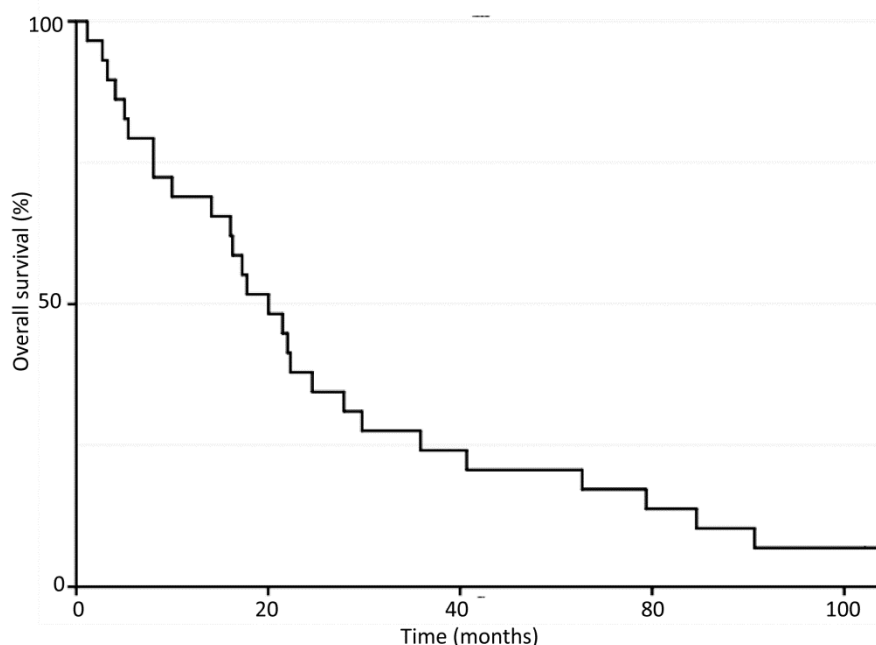

**Figure S1. Overall survival analysis of patients analyzed for circulating cell-free *PIK3CA* mutations in serum.** Kaplan-Meier curves illustrates overall survival of metastatic breast cancer patients with *PIK3CA* mutation and wild type (n=29). Median overall survival for all patients were 20 months.
